# Supplementary material for: High proportions of post-exertional malaise and orthostatic intolerance in people living with post-COVID-19 condition: the PRIME post-COVID study
Source: bioRxiv or medRxiv preprint supplement (doi:10.1101/2023.08.17.23294204), 2023-08-23

Supplementary Figure 1. Post-exertional malaise (PEM) and orthostatic intolerance (OI) proportion estimates according to other, previously used post-COVID-19 condition definitions

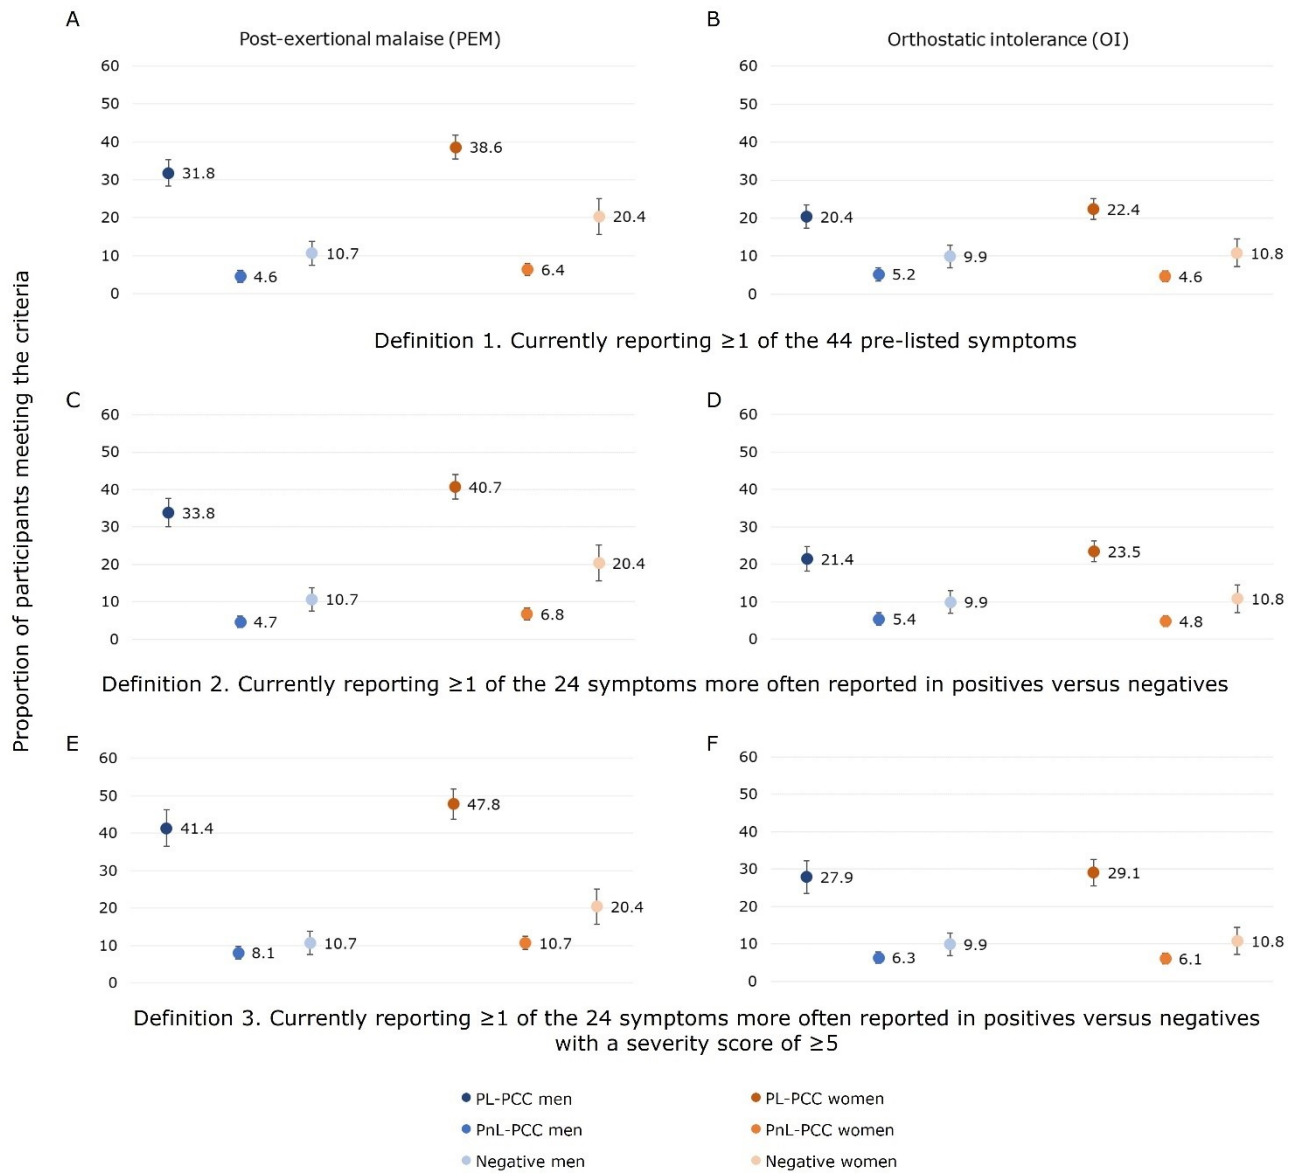

Supplement: Supplementary file [file media-1.pdf]
