# Supplementary material for: High proportions of post-exertional malaise and orthostatic intolerance in people living with post-COVID-19 condition: the PRIME post-COVID study
Source: bioRxiv or medRxiv preprint supplement (doi:10.1101/2023.08.17.23294204), 2023-08-23
Supplement: Supplementary file [file media-2.pdf]

Supplementary Table 1. Proportions of post-exertional malaise (PEM) and orthostatic intolerance (OI) in people living with post-COVID-19 condition (PL-PCC) separate for men and women, stratified by various periods since testing

| Months since positive SARS-CoV-2 test | Men (n=398) |       |        |      |      |        | Women (n=557) |     |       |        |      |      |        |      |
|---------------------------------------|-------------|-------|--------|------|------|--------|---------------|-----|-------|--------|------|------|--------|------|
|                                       | n           | % PEM | 95% CI |      | % OI | 95% CI |               | n   | % PEM | 95% CI |      | % OI | 95% CI |      |
| 3-6                                   | 25          | 44.0  | 24.5   | 63.5 | 32.0 | 13.7   | 50.3          | 28  | 42.9  | 24.6   | 61.2 | 25.0 | 9.0    | 41.0 |
| 6-9                                   | 40          | 52.5  | 37.0   | 68.0 | 32.5 | 18.0   | 47.0          | 74  | 56.8  | 45.5   | 68.1 | 35.1 | 24.2   | 46.0 |
| 9-12                                  | 25          | 40.0  | 20.8   | 59.2 | 24.0 | 7.3    | 40.7          | 46  | 39.1  | 25.0   | 53.2 | 19.6 | 8.1    | 31.1 |
| 12-18                                 | 182         | 40.1  | 33.0   | 47.2 | 31.3 | 24.6   | 38.0          | 216 | 55.6  | 49.0   | 62.2 | 30.6 | 24.5   | 36.7 |
| >18                                   | 126         | 38.9  | 30.4   | 47.4 | 21.4 | 14.2   | 28.6          | 193 | 50.3  | 43.2   | 57.4 | 28.5 | 22.1   | 34.9 |

CI: confidence intervals; OI: orthostatic intolerance; PEM: post-exertional malaise.
